# Supplementary material for: The Use of Schisandrin B to Combat Triple-Negative Breast Cancers by Inhibiting NLRP3-Induced Interleukin-1β Production
Source: MDPI journal article supplement (doi:10.3390/biom14010074), 2024-01-05

Original blots for Figure 2J

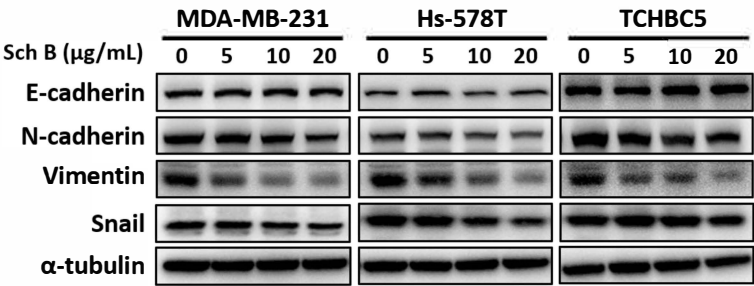

E-cadherin

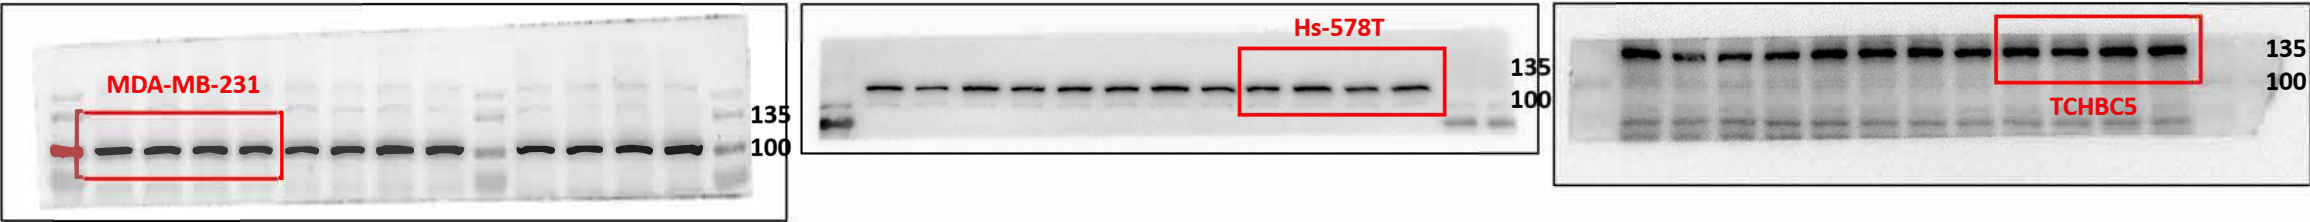

N-cadherin

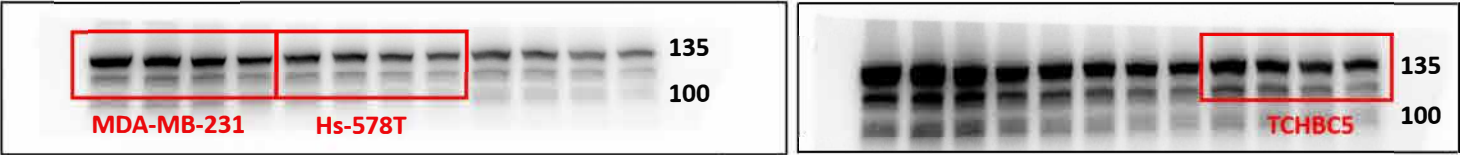

Vimentin

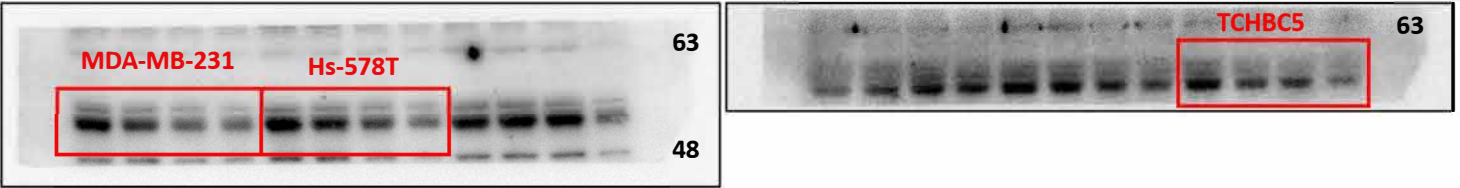

Snail

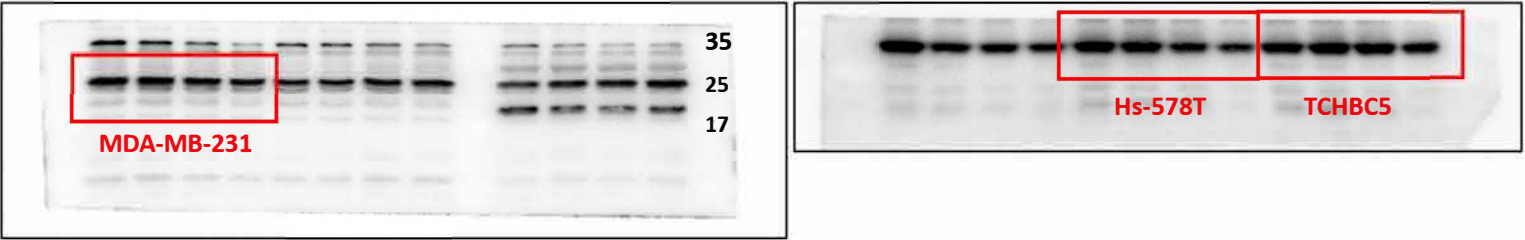

α-tubulin

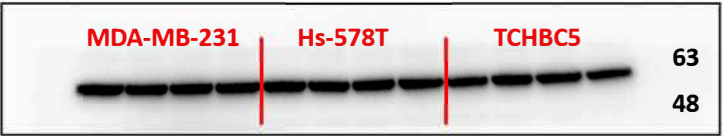

# Original blots for Figure 3A MDA-

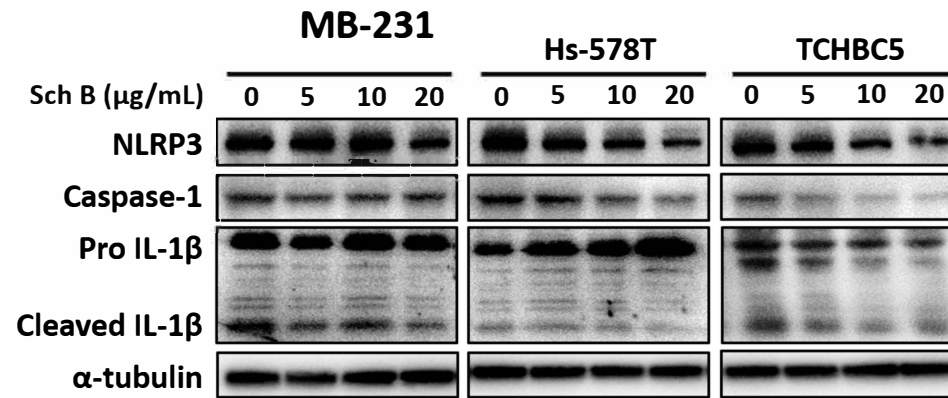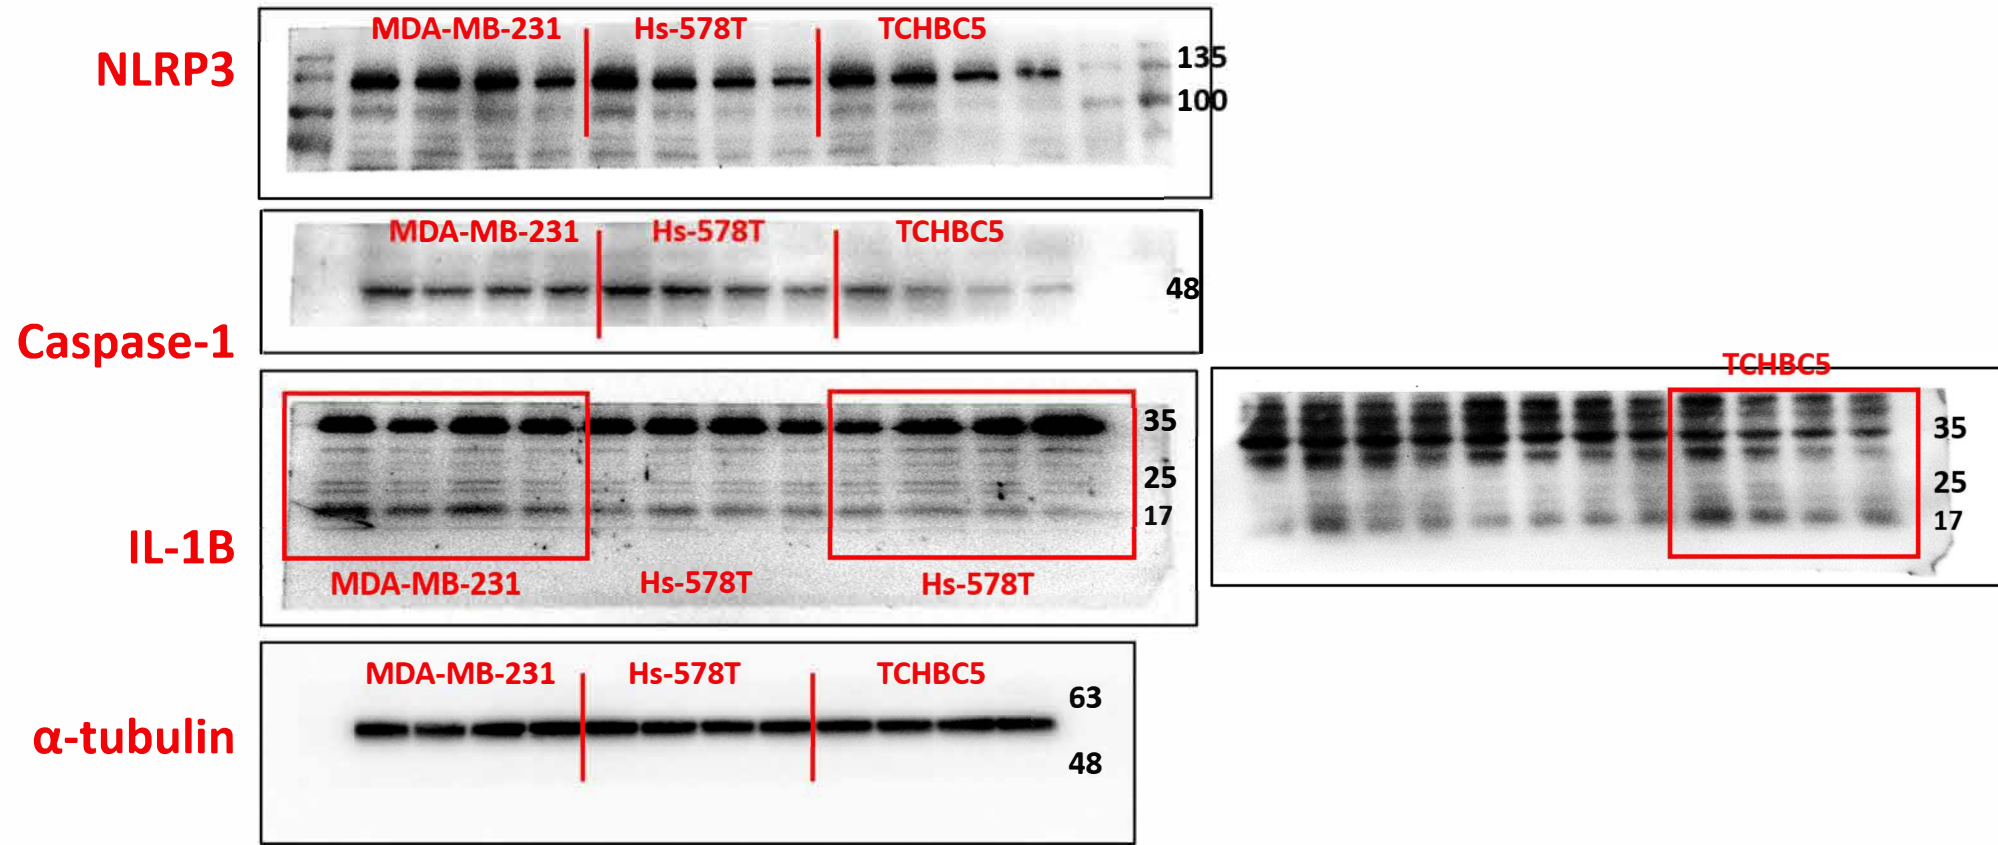

# Original blots for Figure 4A

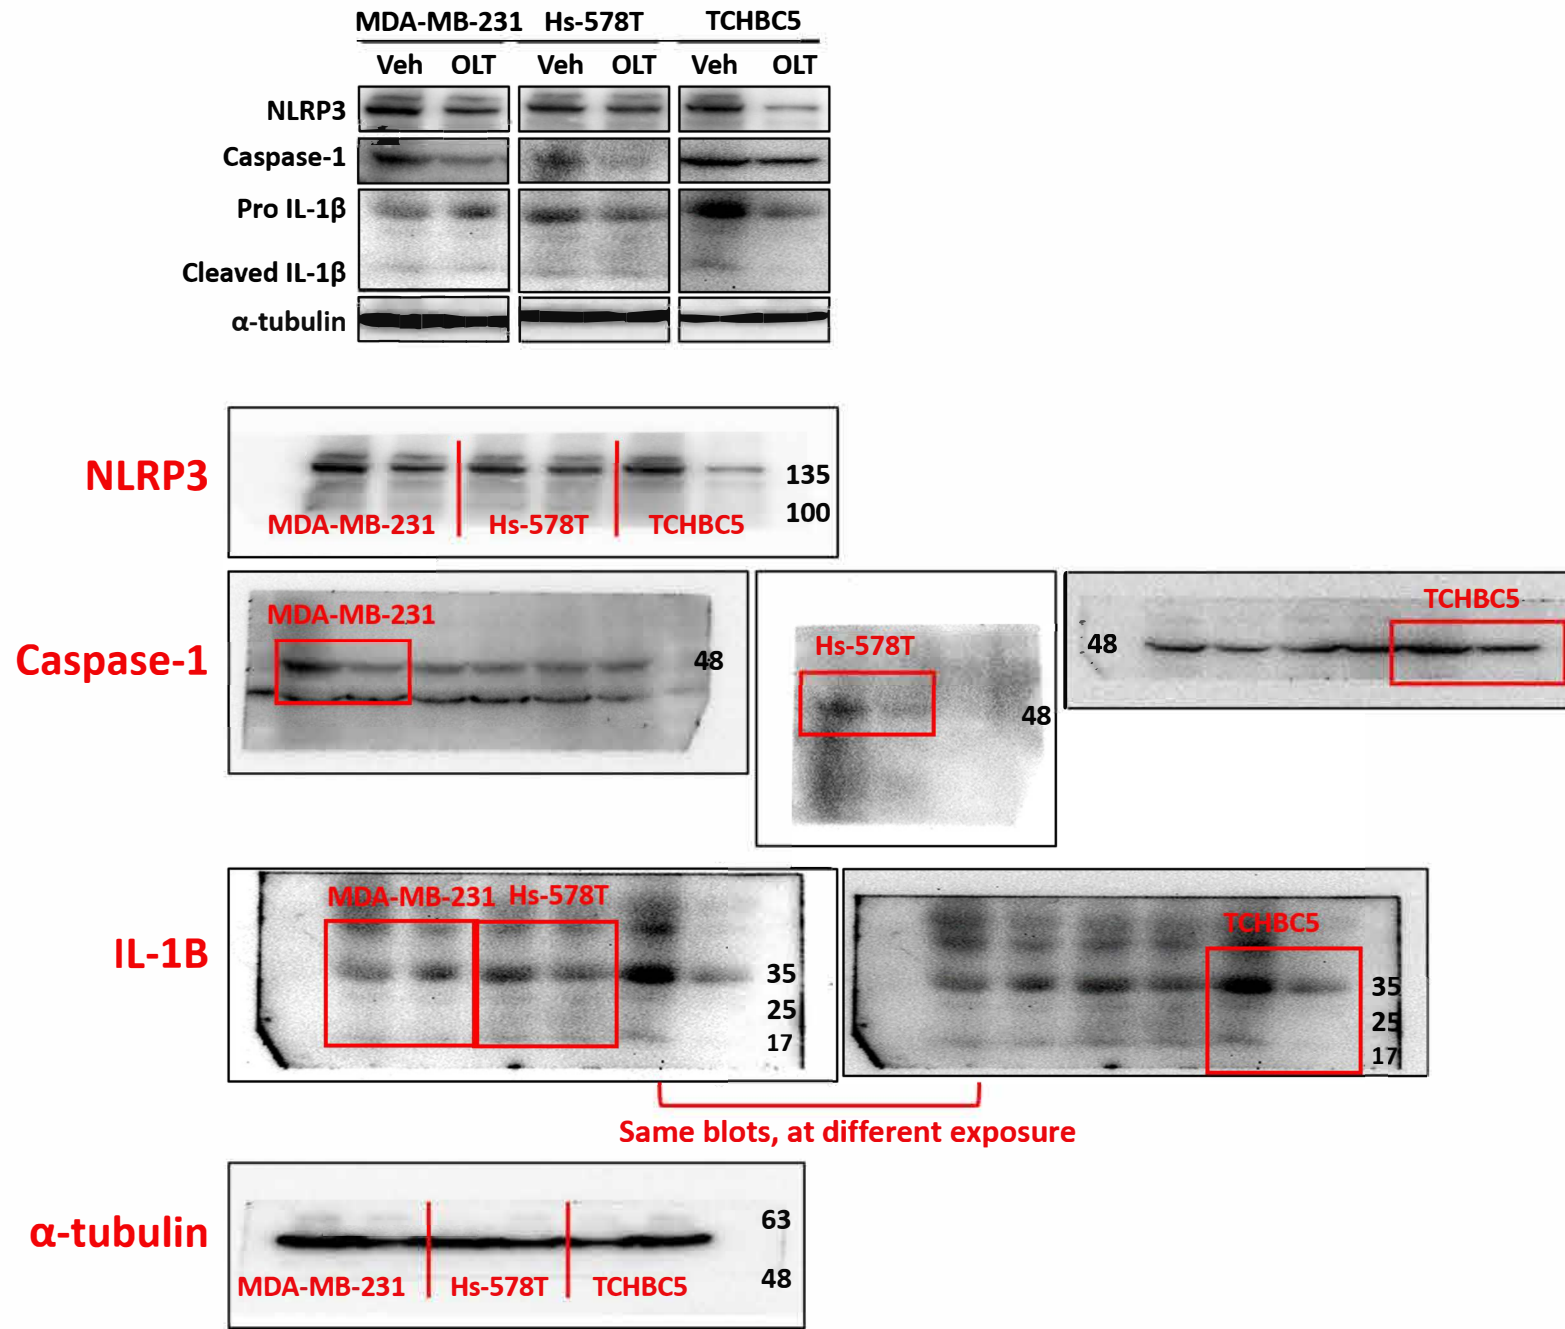

# Original blots for Figure 5D

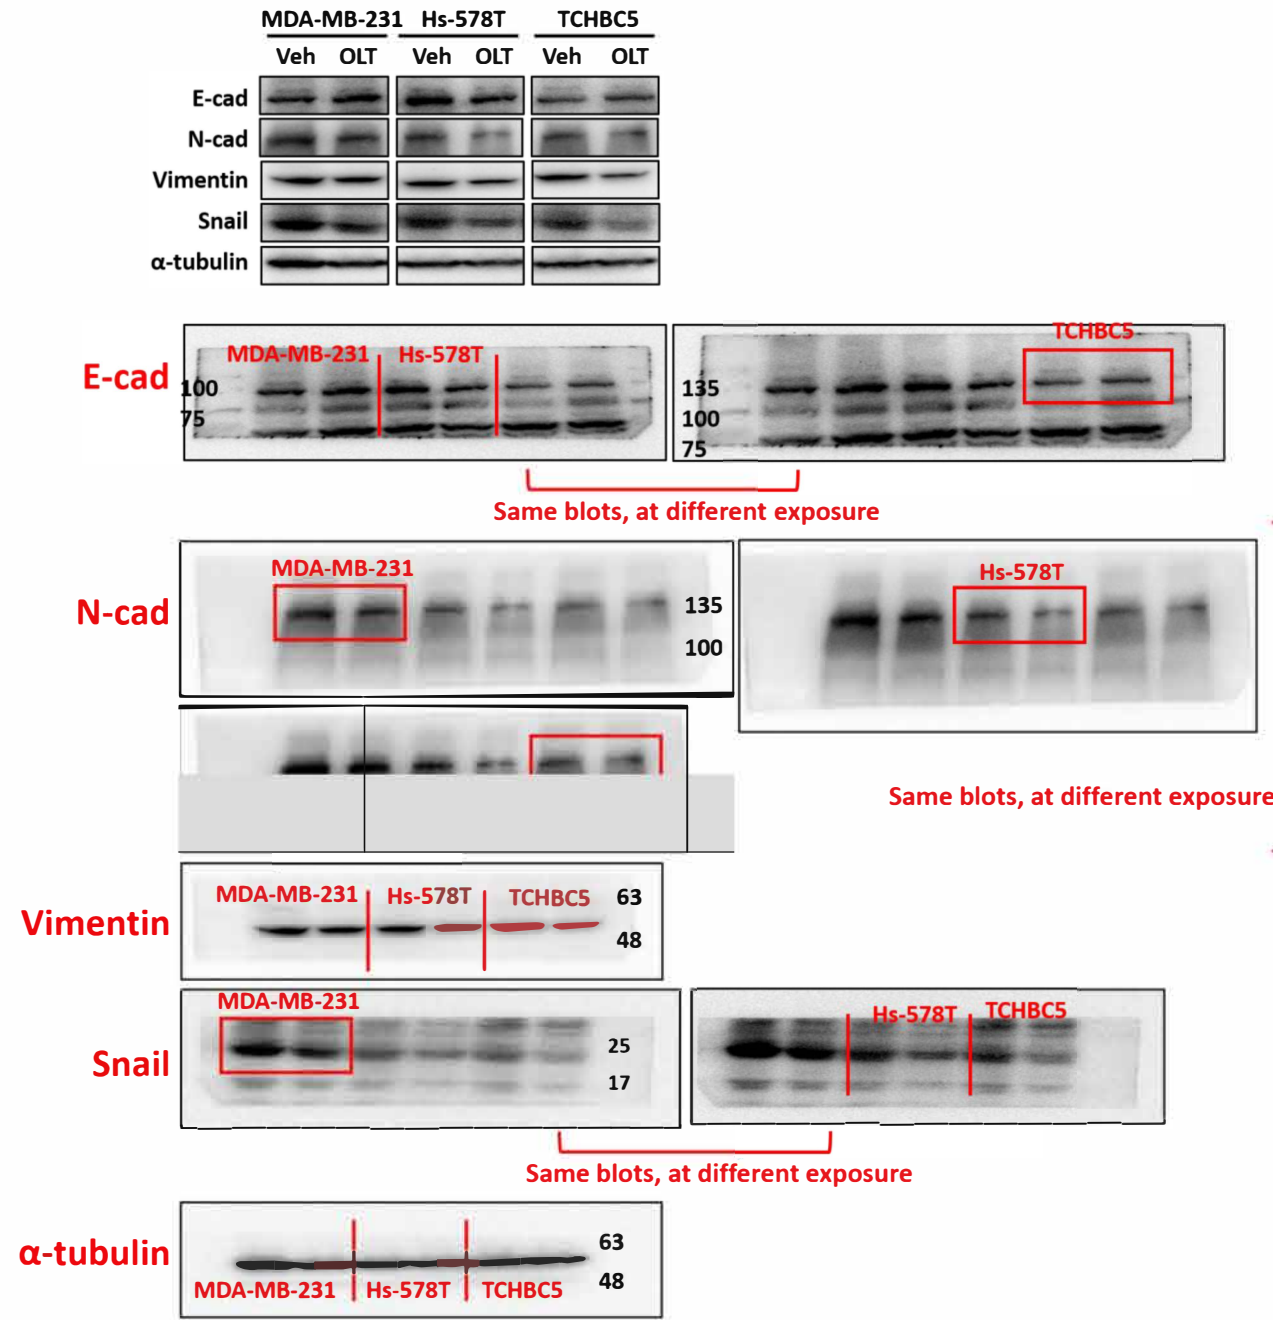



# Original blots for Figure 6D

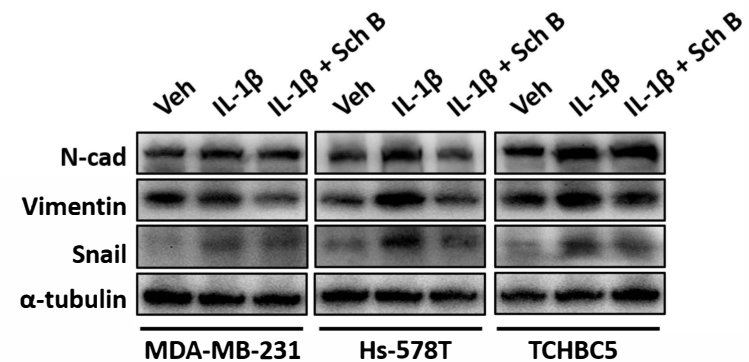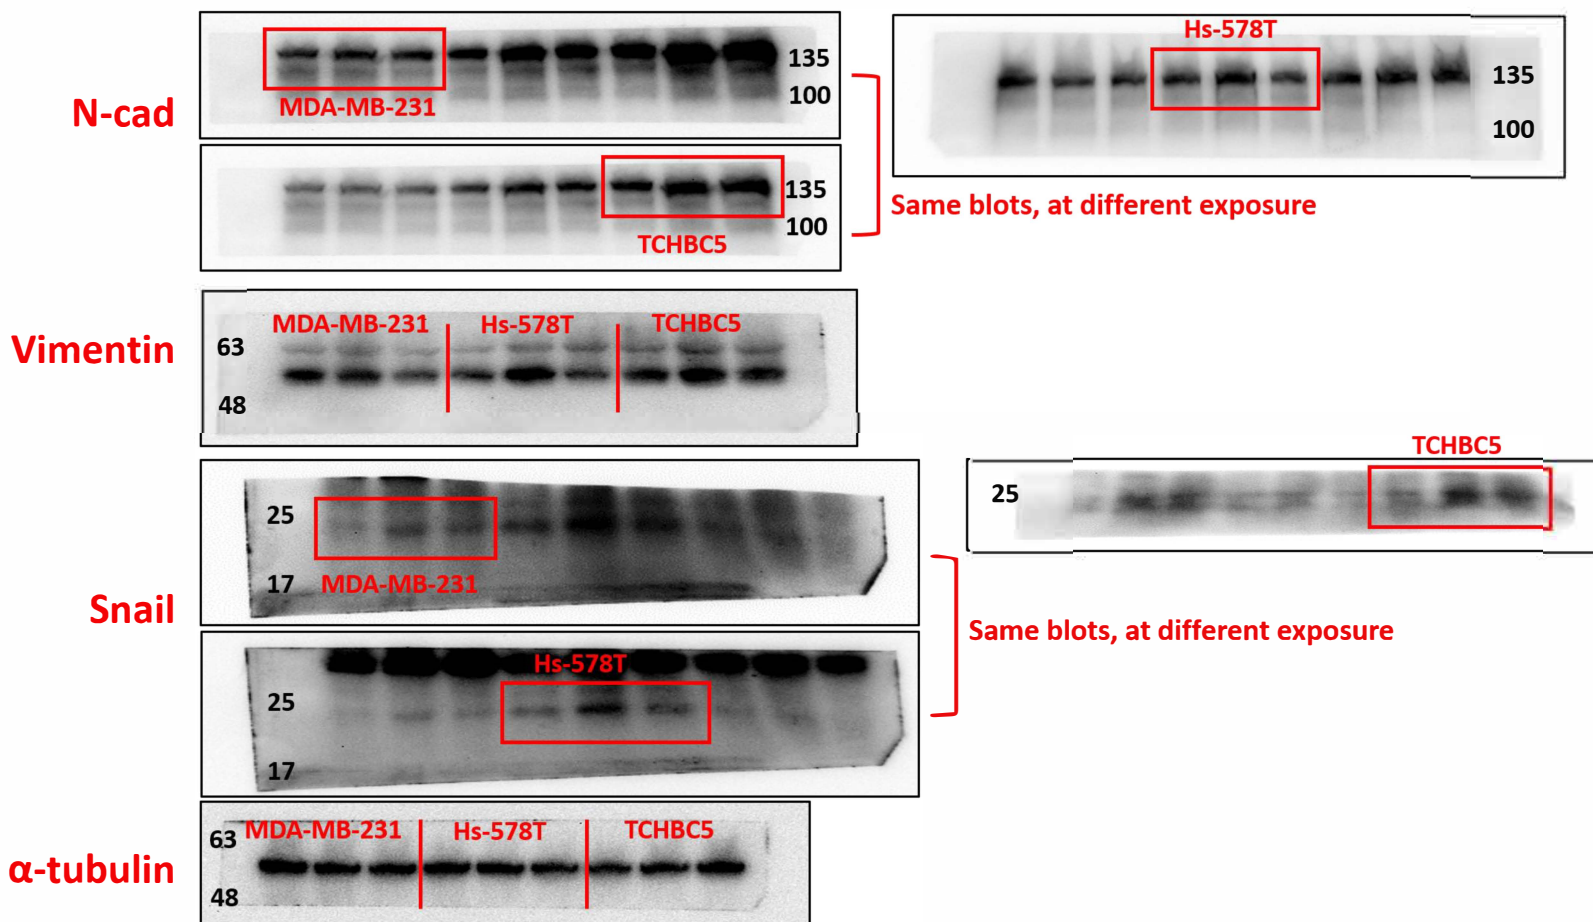

Supplement: s1 [file s1]
